# Supplementary material
Source: publisher figshare collection journal article supplement (https://gsapubs.figshare.com/ndownloader/files/38883162)
Supplement: Supplementary file 1 [file 38883162]

## Sheet: Sheet1
Sample	PC [%]	RC [%]	TOC [%]	MINC [%]	HI [mg HC/g TOC]	OI [mg CO2/g TOC]	Tmax [°C]	S1 [mg HC/g]	S2a [mg HC/g]	S2b [mg HC/g]	S3	Re6type	Quant	CyclN	CyclT
25390	2.29	0.85	3.14	0.08	293	10	381	18.26	9.2	0	0.32	Analysis	71.3	Basic	Bulk Rock
25420	2.43	1.12	3.55	0.06	367	17	380	16.05	13.04	0	0.6	Analysis	64.6	Basic	Bulk Rock
25450	2.26	0.98	3.24	0.04	321	14	380	16.68	10.39	0	0.44	Analysis	55	Basic	Bulk Rock
25480	2.91	1.07	3.98	0.04	274	9	379	24.05	10.93	0	0.37	Analysis	63.2	Basic	Bulk Rock
25510	2.04	0.97	3.01	0.04	275	11	373	16.17	8.28	0	0.33	Analysis	66.1	Basic	Bulk Rock
25520	2.96	1.08	4.04	0.07	311	12	375	22.97	12.57	0	0.47	Analysis	59	Basic	Bulk Rock
25540	1.86	0.88	2.74	0.05	280	10	382	14.62	7.69	0	0.29	Analysis	62.4	Basic	Bulk Rock
25570	1.6	0.7	2.3	0.05	268	12	377	13.07	6.17	0	0.27	Analysis	69.7	Basic	Bulk Rock
25600	2.22	0.68	2.9	0.07	284	10	375	18.38	8.23	0	0.28	Analysis	69.7	Basic	Bulk Rock
25610	2.3	0.67	2.97	0.04	328	13	376	17.84	9.72	0	0.38	Analysis	70.4	Basic	Bulk Rock
25620	2.64	0.72	3.36	0.06	386	16	374	18.62	12.99	0	0.53	Analysis	57.6	Basic	Bulk Rock
25630	2.43	0.57	3	0.05	503	20	376	14.01	15.1	0	0.61	Analysis	50.6	Basic	Bulk Rock
25640	1.21	0.66	1.87	0.03	300	15	365	8.9	5.61	0	0.29	Analysis	68.7	Basic	Bulk Rock
25650	2	0.56	2.55	0.14	345	20	376	15.1	8.81	0	0.52	Analysis	54	Basic	Bulk Rock
25660	1.23	0.64	1.87	0.04	238	13	354	10.34	4.45	0	0.24	Analysis	51.3	Basic	Bulk Rock
25670	1.15	0.66	1.81	0.05	226	11	358	9.7	4.1	0	0.2	Analysis	60.2	Basic	Bulk Rock
25680	1.92	0.9	2.82	0.04	294	15	376	14.73	8.27	0	0.42	Analysis	54.7	Basic	Bulk Rock
25690	1.81	0.72	2.53	0.05	304	16	359	13.98	7.7	0	0.4	Analysis	56.6	Basic	Bulk Rock
25700	2.15	0.8	2.95	0.05	273	10	361	17.77	8.07	0	0.3	Analysis	54.6	Basic	Bulk Rock
25710	2.31	0.82	3.14	0.07	263	10	345	19.52	8.24	0	0.32	Analysis	55.3	Basic	Bulk Rock
25730	3.13	0.97	4.1	0.06	421	15	335	20.26	17.27	0	0.63	Analysis	61.3	Basic	Bulk Rock
25740	2.63	0.94	3.57	0.08	320	11	313	20.19	11.42	0	0.41	Analysis	63.7	Basic	Bulk Rock
25750	2.35	0.89	3.23	0.06	325	9	345	17.68	10.49	0	0.28	Analysis	67.6	Basic	Bulk Rock
25760	2.68	0.9	3.58	0.08	343	10	341	19.92	12.28	0	0.34	Analysis	66.4	Basic	Bulk Rock
25770	2.48	1.03	3.51	0.06	343	9	332	17.71	12.02	0	0.33	Analysis	66.8	Basic	Bulk Rock
25780	2.57	1	3.58	0.07	357	7	356	18.18	12.77	0	0.25	Analysis	53.8	Basic	Bulk Rock
25790	2.54	0.82	3.36	0.05	299	11	359	20.45	10.06	0	0.37	Analysis	56.3	Basic	Bulk Rock
25800	2.54	0.89	3.43	0.04	276	8	343	21.05	9.47	0	0.29	Analysis	62	Basic	Bulk Rock
25810	2.64	0.91	3.55	0.05	308	7	305	20.75	10.92	0	0.25	Analysis	54.6	Basic	Bulk Rock
25820	2.47	0.9	3.37	0.05	344	7	328	18.11	11.61	0	0.23	Analysis	64.1	Basic	Bulk Rock
25830	2.52	0.81	3.32	0.05	345	6	330	18.78	11.48	0	0.21	Analysis	63.4	Basic	Bulk Rock
25840	2.48	0.88	3.36	0.04	338	6	318	18.48	11.37	0	0.21	Analysis	51.9	Basic	Bulk Rock
25850	2.2	0.86	3.06	0.05	365	7	325	15.26	11.15	0	0.21	Analysis	58.1	Basic	Bulk Rock
25860	2.56	0.87	3.43	0.04	350	7	322	18.78	12.01	0	0.25	Analysis	62.4	Basic	Bulk Rock
25870	2.29	0.93	3.22	0.05	366	7	332	15.69	11.79	0	0.22	Analysis	52.7	Basic	Bulk Rock
25880	2.55	0.86	3.41	0.07	372	9	360	17.93	12.68	0	0.32	Analysis	52.1	Basic	Bulk Rock
25890	3.02	0.85	3.87	0.05	375	10	369	21.75	14.52	0	0.4	Analysis	52.1	Basic	Bulk Rock
25900	2.48	0.77	3.25	0.06	364	7	368	17.97	11.82	0	0.22	Analysis	58	Basic	Bulk Rock
25910	2.52	0.8	3.32	0.05	267	8	373	21.36	8.86	0	0.28	Analysis	61.2	Basic	Bulk Rock
25920	2.3	0.84	3.14	0.04	343	8	315	16.9	10.78	0	0.26	Analysis	53.4	Basic	Bulk Rock
25930	1.79	0.88	2.67	0.06	408	12	371	10.56	10.9	0	0.31	Analysis	56.8	Basic	Bulk Rock
25940	1.63	0.64	2.27	0.09	392	9	377	10.66	8.88	0	0.2	Analysis	66.5	Basic	Bulk Rock
25950	2.03	0.67	2.7	0.07	408	13	380	13.32	11	0	0.34	Analysis	68.7	Basic	Bulk Rock
25960	2.65	0.92	3.58	0.05	377	10	377	18.39	13.48	0	0.35	Analysis	66.3	Basic	Bulk Rock
25970	1.89	0.99	2.88	0.07	405	11	371	11.03	11.67	0	0.32	Analysis	64.7	Basic	Bulk Rock
25980	1.54	0.91	2.45	0.04	452	10	379	7.43	11.09	0	0.24	Analysis	63.1	Basic	Bulk Rock
25990	1.93	0.93	2.86	0.05	401	8	367	11.72	11.48	0	0.23	Analysis	62.8	Basic	Bulk Rock
26000	2.08	0.89	2.96	0.05	413	7	374	12.71	12.23	0	0.21	Analysis	70.6	Basic	Bulk Rock
26010	2.49	0.76	3.25	0.04	422	15	379	16.1	13.71	0	0.5	Analysis	71.3	Basic	Bulk Rock
26020	1.9	1.03	2.93	0.05	389	8	358	11.39	11.41	0	0.23	Analysis	66.1	Basic	Bulk Rock
26030	1.95	1.07	3.02	0.04	409	8	360	11.08	12.35	0	0.24	Analysis	67.5	Basic	Bulk Rock
26040	1.89	1.07	2.96	0.05	430	11	369	9.97	12.72	0	0.33	Analysis	65.1	Basic	Bulk Rock
26050	1.92	0.96	2.88	0.05	395	10	357	11.66	11.4	0	0.28	Analysis	69.2	Basic	Bulk Rock
26060	2.18	1.18	3.37	0.04	379	8	330	13.44	12.77	0	0.28	Analysis	62.2	Basic	Bulk Rock
26070	1.89	1.02	2.91	0.04	429	11	358	10.18	12.47	0	0.32	Analysis	60.8	Basic	Bulk Rock
26080	1.97	0.9	2.87	0.03	424	9	345	11.46	12.17	0	0.25	Analysis	63.4	Basic	Bulk Rock
26090	1.99	0.96	2.96	0.03	407	9	342	11.9	12.05	0	0.25	Analysis	65.2	Basic	Bulk Rock
26100	1.84	1	2.85	0.04	424	10	360	10.06	12.06	0	0.27	Analysis	61.8	Basic	Bulk Rock
26110	1.9	1.06	2.96	0.04	408	9	356	10.71	12.06	0	0.25	Analysis	61.9	Basic	Bulk Rock
26120	1.92	1.14	3.06	0.04	398	10	357	10.83	12.18	0	0.29	Analysis	66.5	Basic	Bulk Rock
26130	1.83	0.96	2.79	0.03	396	9	339	10.92	11.05	0	0.24	Analysis	66.4	Basic	Bulk Rock
26140	2.26	0.87	3.14	0.03	355	7	312	16.06	11.12	0	0.23	Analysis	72	Basic	Bulk Rock
26150	2.31	0.95	3.26	0.04	340	8	313	16.68	11.09	0	0.25	Analysis	72.1	Basic	Bulk Rock
26160	1.96	1.01	2.97	0.03	405	10	346	11.48	12.03	0	0.29	Analysis	61.7	Basic	Bulk Rock
26170	1.85	1.02	2.87	0.04	424	10	347	10.03	12.19	0	0.28	Analysis	66	Basic	Bulk Rock
26180	2	1.01	3.01	0.04	382	9	339	12.54	11.5	0	0.27	Analysis	69.3	Basic	Bulk Rock
26190	2.1	0.99	3.09	0.05	365	9	333	13.95	11.3	0	0.28	Analysis	70.3	Basic	Bulk Rock
26200	1.78	0.93	2.71	0.04	415	9	347	10.12	11.28	0	0.24	Analysis	69.1	Basic	Bulk Rock
26210	1.88	1.08	2.96	0.04	387	11	340	11.09	11.47	0	0.33	Analysis	62.4	Basic	Bulk Rock
26220	1.86	0.99	2.84	0.04	408	9	347	10.68	11.6	0	0.26	Analysis	65.1	Basic	Bulk Rock
26230	1.92	1.05	2.97	0.03	376	11	332	11.89	11.17	0	0.31	Analysis	67.7	Basic	Bulk Rock
26240	2.27	1.01	3.29	0.04	381	10	358	14.75	12.53	0	0.32	Analysis	69.2	Basic	Bulk Rock
26250	2.08	1.04	3.12	0.03	363	8	332	13.64	11.35	0	0.25	Analysis	69.3	Basic	Bulk Rock
26260	2.07	1.02	3.09	0.04	349	9	335	14.09	10.78	0	0.28	Analysis	64.7	Basic	Bulk Rock
26270	2	0.97	2.97	0.04	366	9	332	13.13	10.87	0	0.25	Analysis	68.9	Basic	Bulk Rock
26280	2.33	0.95	3.28	0.06	352	8	328	16.42	11.52	0	0.26	Analysis	66.5	Basic	Bulk Rock
26290	2.07	0.96	3.03	0.03	355	8	332	14.11	10.75	0	0.23	Analysis	67.3	Basic	Bulk Rock
26310	1.89	0.84	2.73	0.04	363	8	362	12.83	9.91	0	0.2	Analysis	68.2	Basic	Bulk Rock
26320	1.47	0.6	2.07	0.06	375	9	368	9.91	7.76	0	0.2	Analysis	65	Basic	Bulk Rock
26330	1.98	0.62	2.6	0.04	383	10	372	13.86	9.96	0	0.27	Analysis	61.4	Basic	Bulk Rock
26340	1.57	0.51	2.08	0.04	352	7	366	11.56	7.32	0	0.15	Analysis	69.3	Basic	Bulk Rock
26350	2.15	0.74	2.89	0.05	354	8	359	15.55	10.23	0	0.24	Analysis	64.9	Basic	Bulk Rock
26360	2.4	0.88	3.28	0.04	346	7	347	17.48	11.34	0	0.24	Analysis	61	Basic	Bulk Rock
26370	2.54	0.66	3.2	0.04	382	12	374	18.24	12.22	0	0.38	Analysis	62.2	Basic	Bulk Rock
26380	2.18	0.69	2.87	0.04	335	7	364	16.57	9.63	0	0.2	Analysis	60.4	Basic	Bulk Rock
26390	2.19	0.66	2.85	0.09	416	12	365	14.46	11.85	0	0.34	Analysis	67.4	Basic	Bulk Rock
26400	2.01	0.65	2.66	0.05	342	7	361	15.11	9.1	0	0.2	Analysis	71.4	Basic	Bulk Rock
26410	2.07	0.52	2.59	0.03	351	10	376	15.76	9.08	0	0.26	Analysis	66.1	Basic	Bulk Rock
26420	2.35	0.61	2.95	0.16	308	6	366	19.14	9.09	0	0.18	Analysis	66.5	Basic	Bulk Rock
26430	2.46	0.91	3.37	0.04	308	8	302	19.15	10.4	0	0.25	Analysis	64.5	Basic	Bulk Rock
26440	2.44	0.84	3.29	0.13	379	10	328	16.87	12.47	0	0.33	Analysis	67.9	Basic	Bulk Rock
26450	2.52	0.79	3.31	0.17	394	10	333	17.24	13.04	0	0.34	Analysis	62.8	Basic	Bulk Rock
26460	2.29	1.25	3.54	0.04	302	7	304	16.81	10.7	0	0.23	Analysis	67.5	Basic	Bulk Rock
26470	1.94	1.07	3.02	0.04	302	6	326	14.27	9.1	0	0.18	Analysis	65.4	Basic	Bulk Rock
26480	2.05	1.23	3.27	0.04	301	7	315	14.73	9.86	0	0.22	Analysis	71.1	Basic	Bulk Rock
26490	2.03	1.26	3.29	0.03	295	7	324	14.71	9.69	0	0.22	Analysis	66.9	Basic	Bulk Rock
26500	2.02	1.28	3.3	0.05	283	8	325	14.92	9.32	0	0.28	Analysis	76.6	Basic	Bulk Rock
26510	2.48	1.33	3.82	0.04	291	7	316	18.74	11.09	0	0.25	Analysis	67.7	Basic	Bulk Rock
26520	2.23	1.09	3.31	0.02	305	6	338	16.65	10.1	0	0.2	Analysis	68.9	Basic	Bulk Rock
26530	2.13	0.94	3.07	0.05	303	7	341	16.24	9.3	0	0.22	Analysis	75.3	Basic	Bulk Rock
26540	1.88	0.74	2.63	0.04	317	9	364	14.28	8.34	0	0.23	Analysis	76.4	Basic	Bulk Rock
26550	2	0.91	2.92	0.03	290	6	366	15.62	8.45	0	0.18	Analysis	79.9	Basic	Bulk Rock
26560	2.08	0.6	2.68	0.04	354	8	372	15.57	9.48	0	0.21	Analysis	70.5	Basic	Bulk Rock
26570	2.32	1	3.32	0.05	277	6	361	18.65	9.18	0	0.2	Analysis	66.4	Basic	Bulk Rock
26580	2.41	1.26	3.67	0.04	299	7	353	17.99	10.96	0	0.25	Analysis	69.8	Basic	Bulk Rock
26590	2.63	1.08	3.72	0.03	298	7	362	20.55	11.08	0	0.24	Analysis	75.3	Basic	Bulk Rock
26600	2.64	1.16	3.81	0.05	298	7	361	20.42	11.35	0	0.26	Analysis	64.2	Basic	Bulk Rock
26610	2.8	1.34	4.14	0.05	291	7	346	21.59	12.04	0	0.29	Analysis	61.8	Basic	Bulk Rock
26620	2.89	1.44	4.33	0.05	316	8	341	21.05	13.7	0	0.33	Analysis	68.1	Basic	Bulk Rock
26630	2.43	1.4	3.83	0.05	286	9	368	18.22	10.94	0	0.33	Analysis	65.9	Basic	Bulk Rock
26640	2.22	1.39	3.6	0.05	277	7	320	16.64	9.96	0	0.26	Analysis	64.8	Basic	Bulk Rock
26650	2.18	1.41	3.59	0.04	266	8	306	16.65	9.56	0	0.27	Analysis	65.1	Basic	Bulk Rock
26660	2.34	0.71	3.05	0.02	330	7	311	18.09	10.07	0	0.2	Analysis	64.1	Basic	Bulk Rock
26670	2.37	0.7	3.07	0.05	311	8	308	18.92	9.55	0	0.23	Analysis	66.9	Basic	Bulk Rock
26680	2.05	0.65	2.7	0.03	313	9	366	16.11	8.45	0	0.24	Analysis	61.5	Basic	Bulk Rock
26690	1.92	0.71	2.64	0.03	269	9	365	16.02	7.09	0	0.24	Analysis	69.1	Basic	Bulk Rock
26700	1.61	0.75	2.36	0.04	255	10	363	13.34	6.02	0	0.24	Analysis	72.5	Basic	Bulk Rock
26710	1.69	0.74	2.43	0.05	240	9	361	14.45	5.84	0	0.22	Analysis	70.1	Basic	Bulk Rock
26720	1.54	0.73	2.28	0.05	235	9	368	13.18	5.35	0	0.2	Analysis	72.1	Basic	Bulk Rock
26730	1.24	0.67	1.92	0.04	238	11	368	10.37	4.56	0	0.21	Analysis	71.5	Basic	Bulk Rock
26740	1.75	0.73	2.48	0.03	263	10	367	14.48	6.53	0	0.25	Analysis	73.3	Basic	Bulk Rock
26750	1.52	0.7	2.23	0.04	258	9	364	12.54	5.76	0	0.2	Analysis	77.7	Basic	Bulk Rock
26760	1.71	0.69	2.4	0.04	267	12	362	14.08	6.42	0	0.28	Analysis	65.1	Basic	Bulk Rock
26770	1.93	0.75	2.68	0.04	307	10	368	14.97	8.23	0	0.27	Analysis	75.4	Basic	Bulk Rock
26780	1.86	0.69	2.55	0.03	364	9	344	13.05	9.3	0	0.23	Analysis	73.6	Basic	Bulk Rock
26790	1.91	0.89	2.8	0.05	317	7	331	14.06	8.88	0	0.2	Analysis	70.2	Basic	Bulk Rock
26800	2.49	1.01	3.5	0.03	308	7	308	19.18	10.79	0	0.23	Analysis	65.7	Basic	Bulk Rock
26810	2.42	0.82	3.23	0.03	340	8	322	18.03	11	0	0.25	Analysis	63.8	Basic	Bulk Rock
26820	2.14	0.65	2.8	0.07	354	8	350	15.85	9.91	0	0.21	Analysis	62.3	Basic	Bulk Rock
26830	2.5	0.81	3.31	0.06	324	8	365	19.31	10.73	0	0.26	Analysis	78.8	Basic	Bulk Rock
26840	2.56	1.3	3.86	0.05	312	7	376	18.69	12.07	0	0.29	Analysis	66.6	Basic	Bulk Rock
26850	2.59	1.24	3.83	0.04	313	8	366	19.13	12	0	0.31	Analysis	71.1	Basic	Bulk Rock
26860	2.68	0.76	3.43	0.05	322	7	343	21.11	11.06	0	0.24	Analysis	62.5	Basic	Bulk Rock
26870	2.18	0.94	3.12	0.04	310	7	345	16.56	9.68	0	0.2	Analysis	76.7	Basic	Bulk Rock
26880	1.95	0.7	2.66	0.07	391	7	344	13.08	10.4	0	0.19	Analysis	72.7	Basic	Bulk Rock
26890	2.11	0.85	2.96	0.04	357	6	358	14.84	10.56	0	0.17	Analysis	58.2	Basic	Bulk Rock
26900	1.84	0.96	2.8	0.05	410	12	357	10.54	11.5	0	0.33	Analysis	62.8	Basic	Bulk Rock
26910	2.23	0.91	3.14	0.07	372	11	320	15.13	11.68	0	0.33	Analysis	65.8	Basic	Bulk Rock
26920	2.28	1.03	3.31	0.05	401	11	343	14.07	13.26	0	0.36	Analysis	64.6	Basic	Bulk Rock
26930	2.44	0.98	3.42	0.04	391	9	343	15.92	13.38	0	0.32	Analysis	65.8	Basic	Bulk Rock
26940	2.23	1	3.23	0.04	399	10	341	13.86	12.89	0	0.33	Analysis	64.5	Basic	Bulk Rock
26950	2.69	0.94	3.63	0.04	335	9	311	20.15	12.15	0	0.32	Analysis	67.6	Basic	Bulk Rock
26960	2.9	1	3.9	0.05	389	10	341	19.62	15.16	0	0.4	Analysis	66.9	Basic	Bulk Rock
26970	2.34	1.03	3.38	0.03	420	11	363	13.93	14.17	0	0.37	Analysis	61.8	Basic	Bulk Rock
26980	2.22	1.03	3.25	0.04	421	11	358	12.96	13.7	0	0.37	Analysis	64.4	Basic	Bulk Rock
26990	2.65	1.04	3.7	0.03	394	9	332	17.3	14.55	0	0.35	Analysis	69.9	Basic	Bulk Rock
27000	2.28	0.93	3.21	0.03	478	13	361	11.95	15.35	0	0.41	Analysis	70.6	Basic	Bulk Rock
27010	2.78	1.12	3.9	0.03	381	9	343	18.56	14.85	0	0.37	Analysis	65.5	Basic	Bulk Rock
27020	3	1.06	4.06	0.03	388	9	342	20.24	15.74	0	0.38	Analysis	68.8	Basic	Bulk Rock
27030	2.91	1.06	3.97	0.03	435	12	360	17.64	17.29	0	0.49	Analysis	67.5	Basic	Bulk Rock
27040	3.03	1.11	4.15	0.05	383	9	362	20.54	15.89	0	0.39	Analysis	60.9	Basic	Bulk Rock
27050	3.45	1.03	4.48	0.03	409	11	377	23.09	18.35	0	0.49	Analysis	70.3	Basic	Bulk Rock
27060	3.14	1.09	4.23	0.04	413	10	354	20.25	17.46	0	0.43	Analysis	60.3	Basic	Bulk Rock
27070	2.61	1.09	3.7	0.03	398	10	343	16.61	14.74	0	0.36	Analysis	65.2	Basic	Bulk Rock
27080	2.9	0.92	3.82	0.04	331	7	331	22.21	12.66	0	0.28	Analysis	62.4	Basic	Bulk Rock
27090	2.99	0.98	3.96	0.03	375	8	350	21.04	14.86	0	0.3	Analysis	67.9	Basic	Bulk Rock
27100	3.14	1.19	4.33	0.04	374	9	360	21.53	16.2	0	0.39	Analysis	67.4	Basic	Bulk Rock
27110	2.22	1.25	3.47	0.04	452	11	373	10.95	15.68	0	0.4	Analysis	63.2	Basic	Bulk Rock
27120	2.73	1.01	3.74	0.05	367	9	329	19.06	13.73	0	0.32	Analysis	70.3	Basic	Bulk Rock
27130	2.6	1.21	3.81	0.03	360	9	332	17.45	13.71	0	0.35	Analysis	61.4	Basic	Bulk Rock
27140	2.58	1.49	4.07	0.04	356	9	342	16.45	14.48	0	0.38	Analysis	60.7	Basic	Bulk Rock
27150	2.77	1.58	4.35	0.04	365	10	336	17.31	15.89	0	0.42	Analysis	65.2	Basic	Bulk Rock
27160	2.79	1.46	4.25	0.04	368	9	340	17.83	15.62	0	0.39	Analysis	61.7	Basic	Bulk Rock
27170	2.77	1.44	4.21	0.04	379	9	342	17.26	15.98	0	0.4	Analysis	61.4	Basic	Bulk Rock
27180	2.6	1.41	4.01	0.04	386	10	353	15.71	15.46	0	0.39	Analysis	68.8	Basic	Bulk Rock
27190	2.6	1.04	3.64	0.03	369	8	340	17.75	13.42	0	0.3	Analysis	64.3	Basic	Bulk Rock
27200	2.58	1.06	3.64	0.04	380	9	337	17.14	13.81	0	0.32	Analysis	71.2	Basic	Bulk Rock
27210	2.62	1.3	3.93	0.03	380	8	343	16.59	14.93	0	0.32	Analysis	71.6	Basic	Bulk Rock
27220	2.64	0.74	3.38	0.12	403	9	372	18.06	13.59	0	0.32	Analysis	66.7	Basic	Bulk Rock
27230	2.86	0.7	3.56	0.09	380	8	376	20.88	13.52	0	0.3	Analysis	65.6	Basic	Bulk Rock
27240	2.37	0.9	3.28	0.14	432	11	373	14.33	14.15	0	0.35	Analysis	71.4	Basic	Bulk Rock
27250	2.29	0.9	3.19	0.16	420	11	367	14.07	13.4	0	0.34	Analysis	67.2	Basic	Bulk Rock
27260	2.53	0.77	3.3	0.17	416	9	363	16.63	13.73	0	0.31	Analysis	65.8	Basic	Bulk Rock
27270	2.14	0.81	2.96	0.15	413	10	344	13.5	12.21	0	0.31	Analysis	69	Basic	Bulk Rock
27280	2.22	0.81	3.03	0.14	435	11	373	13.42	13.19	0	0.33	Analysis	60.4	Basic	Bulk Rock
27290	2.44	0.77	3.21	0.16	424	12	361	15.68	13.64	0	0.37	Analysis	62.8	Basic	Bulk Rock
27300	1.98	0.83	2.81	0.15	422	11	362	11.92	11.87	0	0.3	Analysis	70.8	Basic	Bulk Rock
27310	2.15	0.95	3.1	0.14	418	10	362	12.89	12.95	0	0.32	Analysis	64.3	Basic	Bulk Rock
27320	2.05	0.92	2.96	0.14	408	10	343	12.48	12.09	0	0.31	Analysis	64.8	Basic	Bulk Rock

## Sheet: G50641
Vimpere, L., et al., 2023, Carbon isotope and biostratigraphic evidence for an expanded Paleocene–Eocene Thermal Maximum sedimentary record in the deep Gulf of Mexico: Geology, https://doi.org/10.1130/G50641.1
